# Supplementary material for: A Capsid Protein Fragment of a Fusagra-like Virus Found in Carica papaya Latex Interacts with the 50S Ribosomal Protein L17
Source: MDPI journal article supplement (doi:10.3390/v15020541), 2023-02-15
Supplement: s1 [file s1]

Supplementary data

# A capsid protein fragment of a fusagra-like virus found in *Carica papaya* latex interacts with the 50S ribosomal protein L17

Marlonni Maurastoni<sup>1,8</sup>, Tathiana F. Sá-Antunes<sup>1</sup>, Emanuel F. M. Abreu<sup>2</sup>, Simone G. Ribeiro<sup>2</sup>, Angela Mehta<sup>2</sup>, Marcio M. Sanches<sup>2</sup>, Wagner Fontes<sup>3</sup>, Elliot W. Kitajima<sup>4</sup>, Fabiano T. Cruz<sup>1</sup>, Alexandre M. C. Santos<sup>1</sup>, Jose A. Ventura<sup>1,5</sup>, Ana C. M. M. Gomes<sup>2</sup>, Francisco M. Zerbini<sup>6</sup>, Patricia Sosa-Acosta<sup>7</sup>, Fábio C. S. Nogueira<sup>7</sup>, Silas P. Rodrigues<sup>8</sup>, Francisco J. L. Aragão<sup>2</sup>, Anna E. Whitfield<sup>9</sup> and Patricia M. B. Fernandes<sup>1\*</sup>

<sup>1</sup> Biotechnology Core, Federal University of Espírito Santo, Vitória, ES 29043-900, Brazil

<sup>2</sup> Embrapa Recursos Genéticos e Biotecnologia, Brasília, DF 70770-917, Brazil

<sup>3</sup> Department of Cell Biology, University of Brasília, Brasília, DF 70910-900, Brazil

<sup>4</sup> Department of Phytopathology, University of São Paulo, Piracicaba, SP 13418-900, Brazil

<sup>5</sup> Espírito Santo Institute for Research, Technical Assistance and Rural Extension, Vitória, ES 29052-010, Brazil

<sup>6</sup> Department of Phytopathology, Federal University of Viçosa, Viçosa, MG 36570-900, Brazil

<sup>7</sup> Department of Biochemistry, Institute of Chemistry, Federal University of Rio de Janeiro, Rio de Janeiro, RJ 21941-909, Brazil

<sup>8</sup> Multidisciplinary Core for Research in Biology, Campus Duque de Caxias, Federal University of Rio de Janeiro, Duque de Caxias, RJ 25240-005, Brazil

<sup>9</sup> Department of Entomology and Plant Pathology, North Carolina State University, 840 Main Campus Drive, Raleigh, NC 27606, USA

\* Correspondence: patricia.fernandes@ufes.br

SAMPLE (pink peaks) and STANDARD (grey peaks)

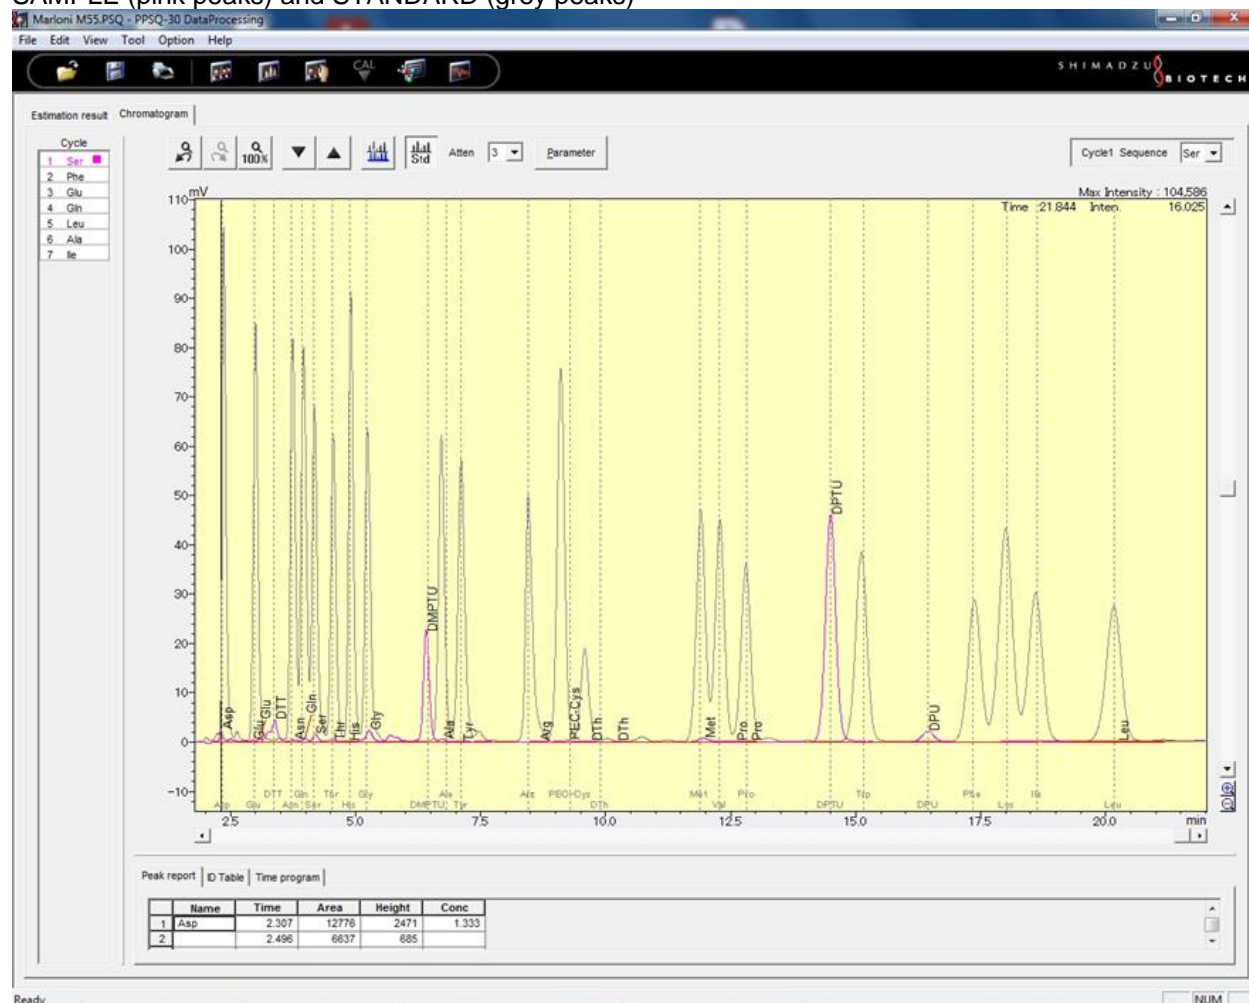

# SERINE (S) / GLYCINE (G)

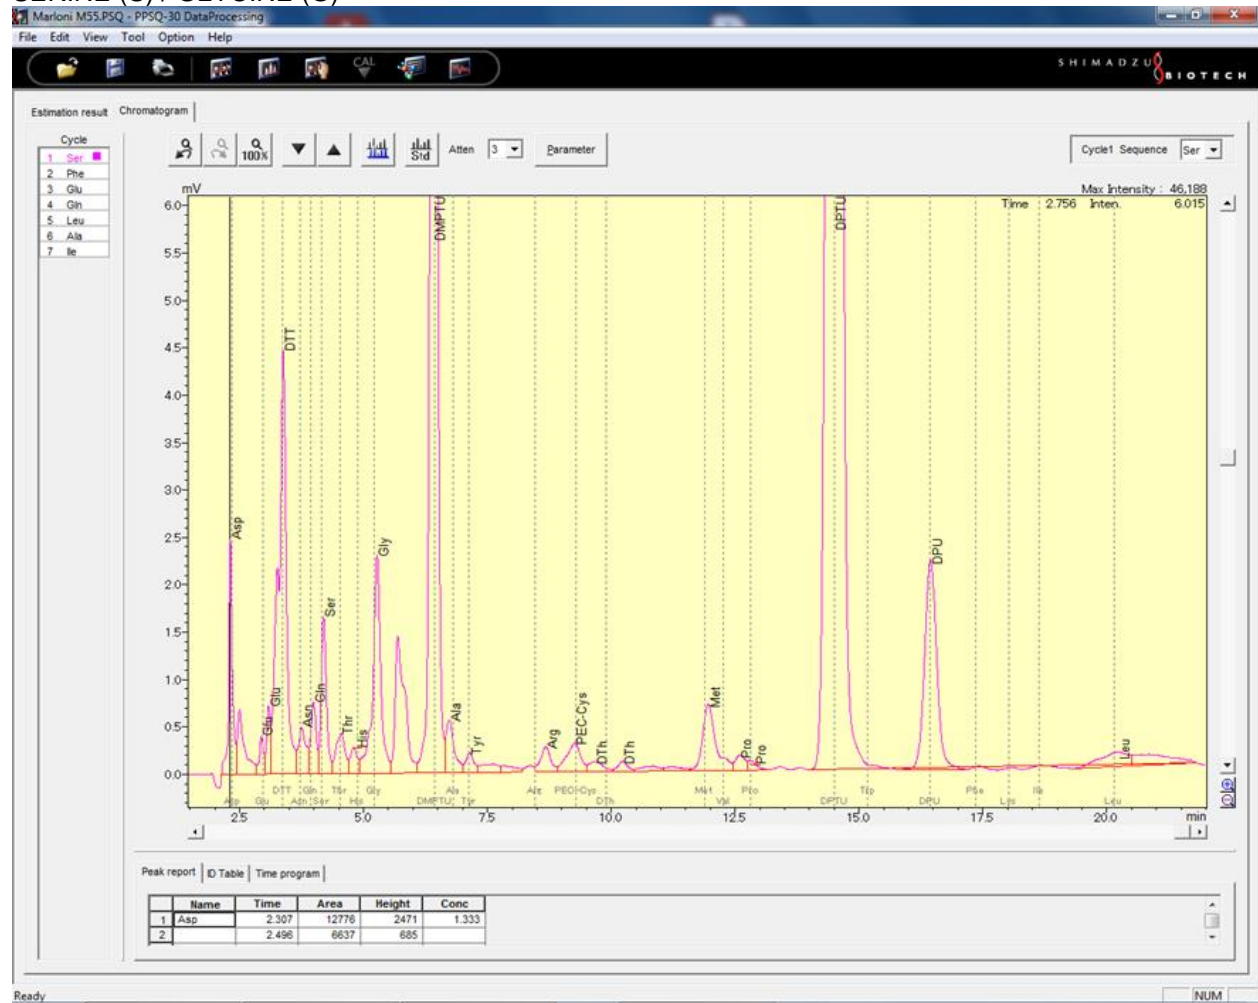

# ANY AMINO ACID X

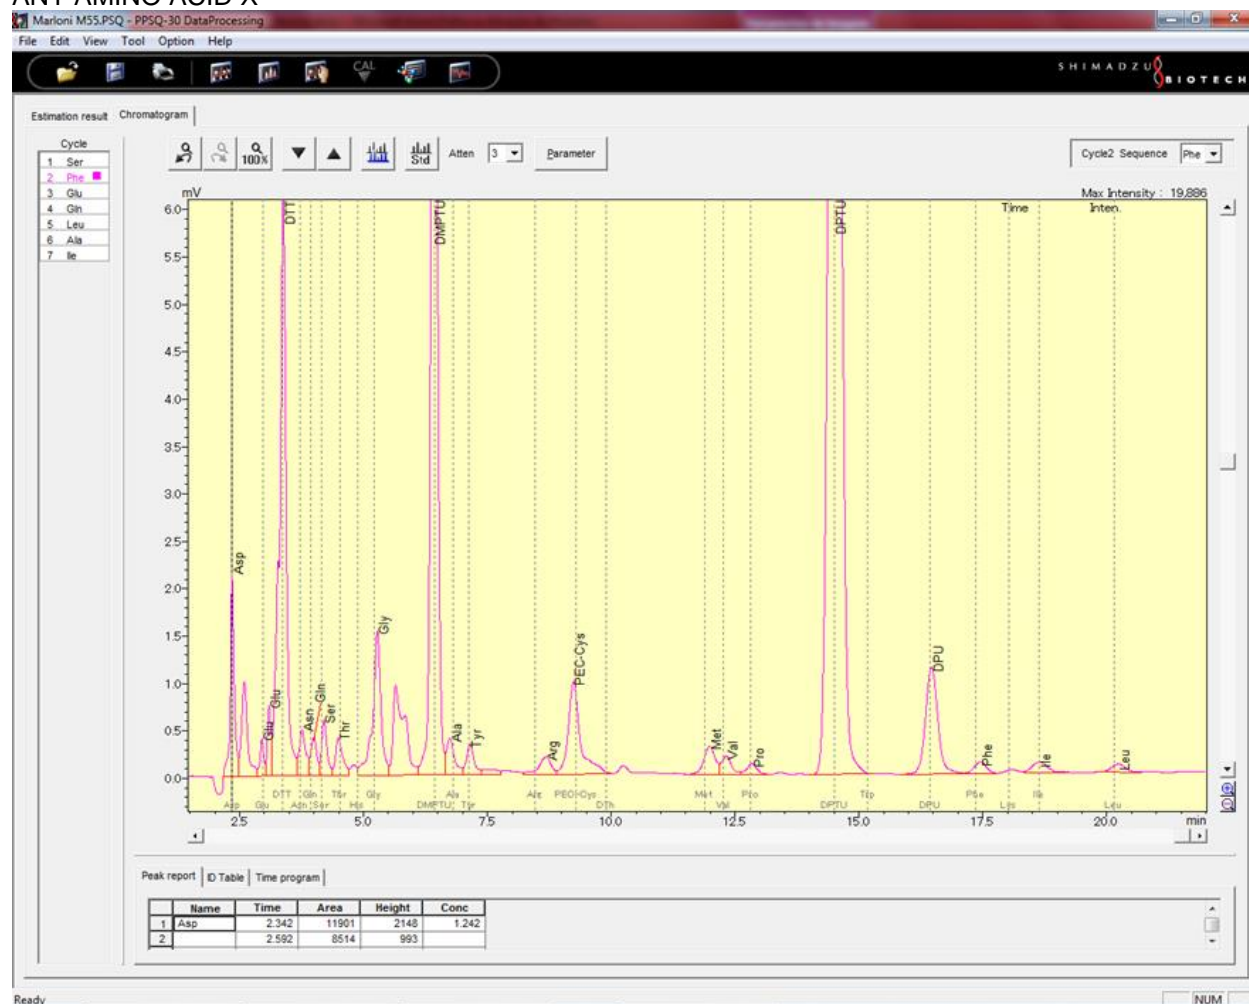

# GLUTAMIC ACID E

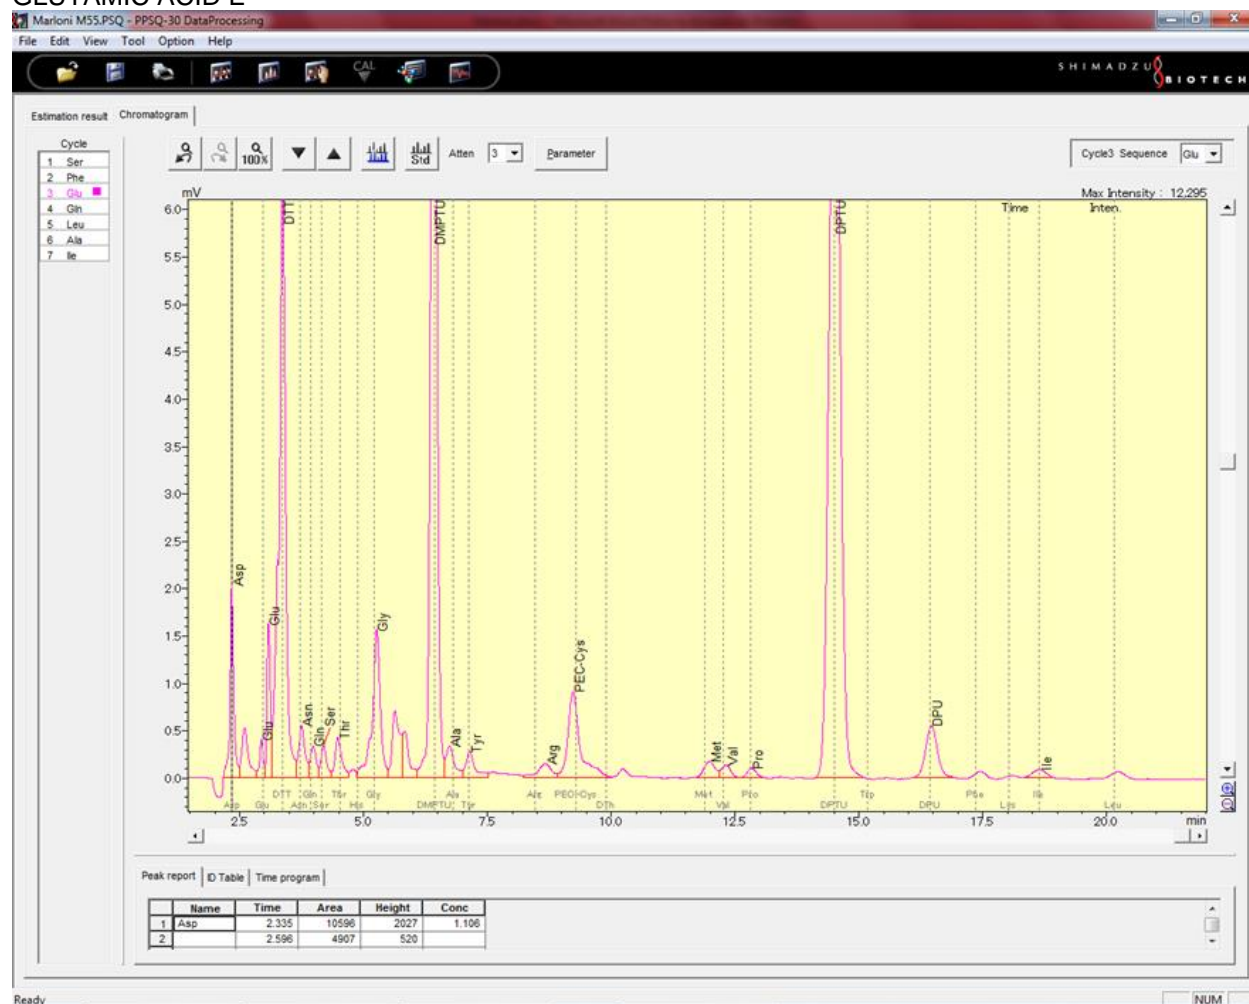

# PHENYLALANINE F

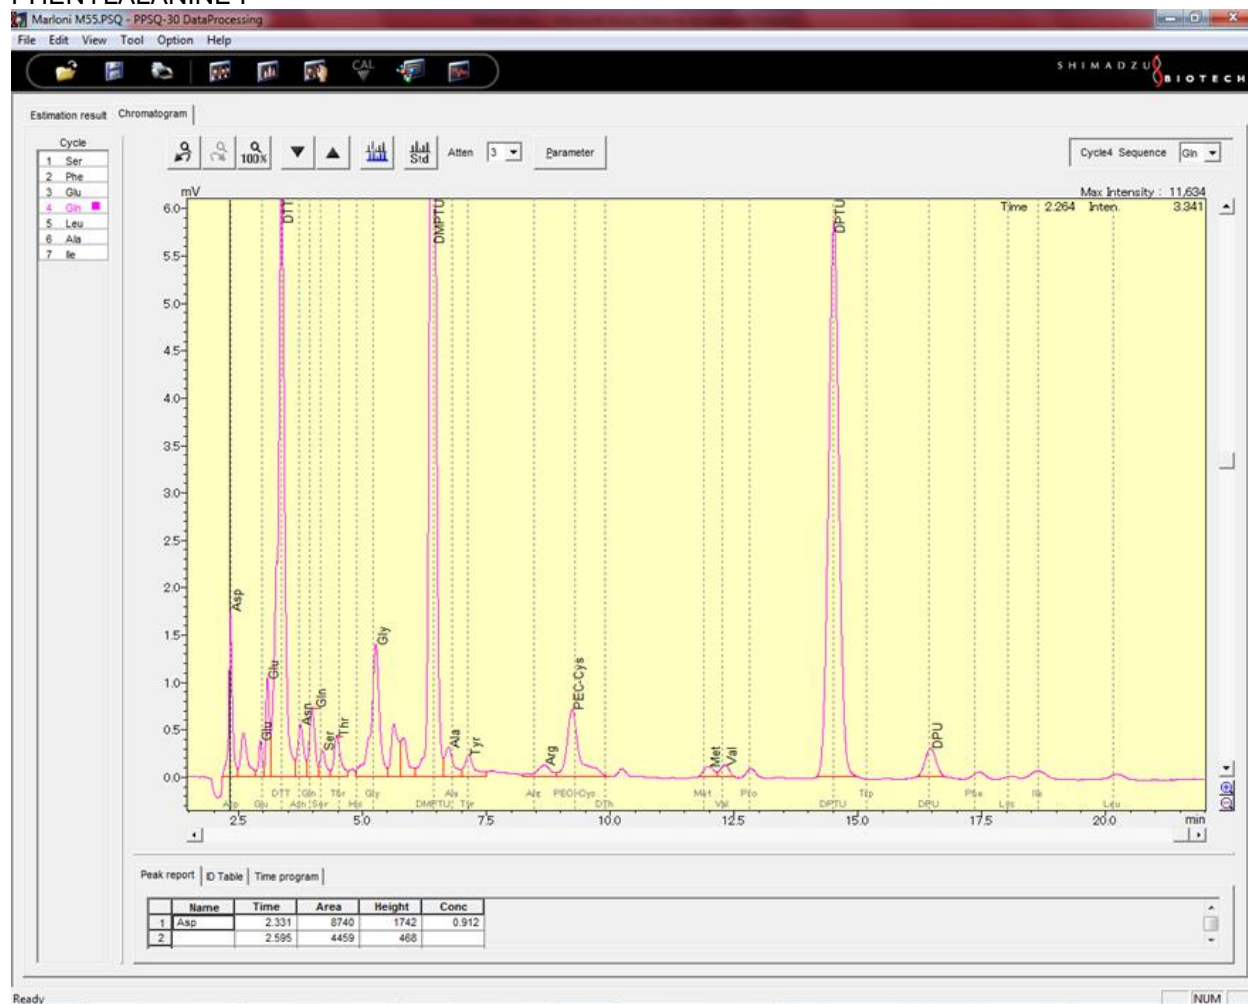



# LEUCINE L

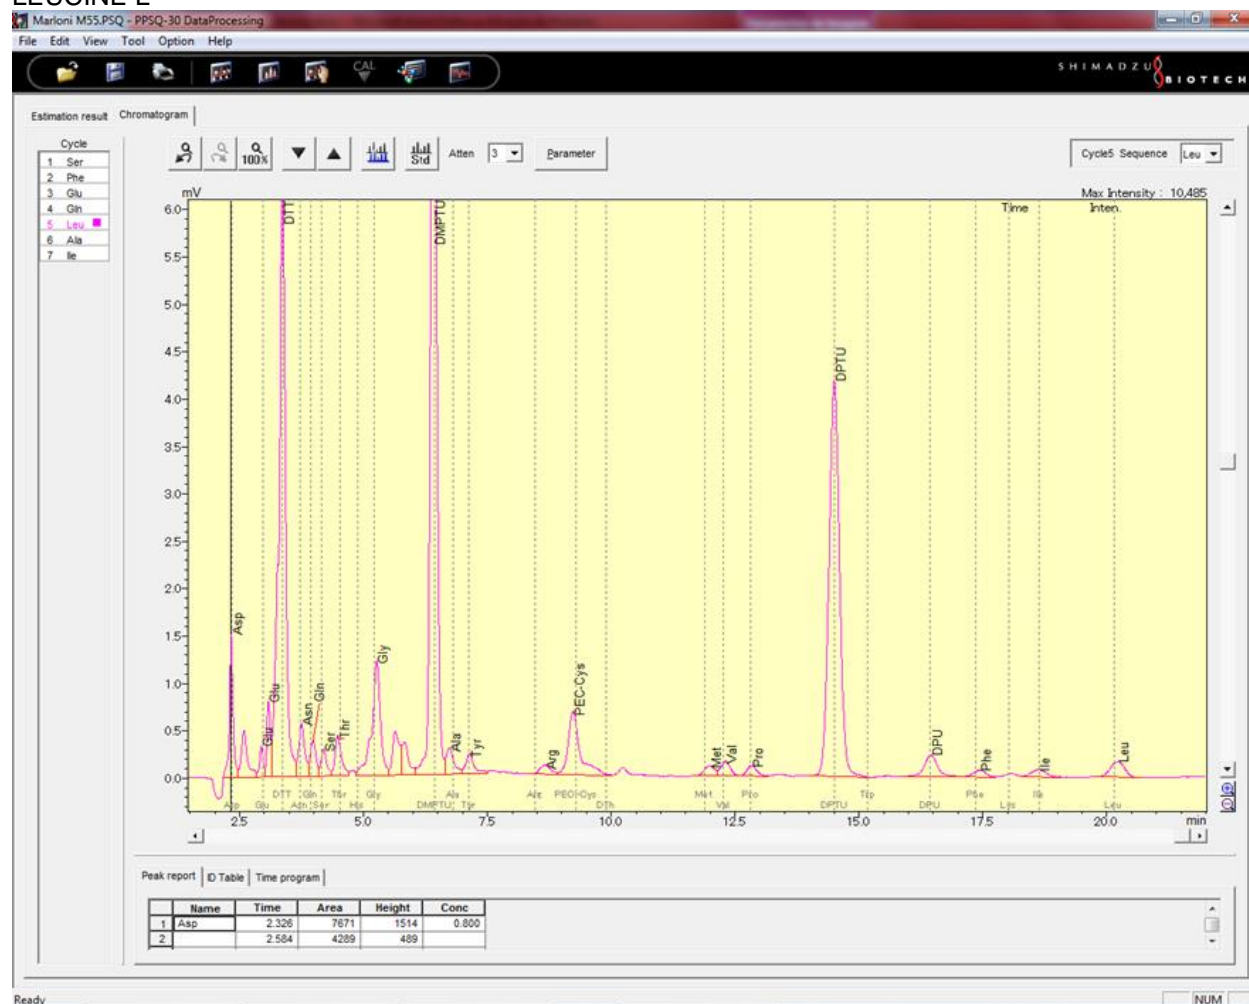

# ALANINE (A)

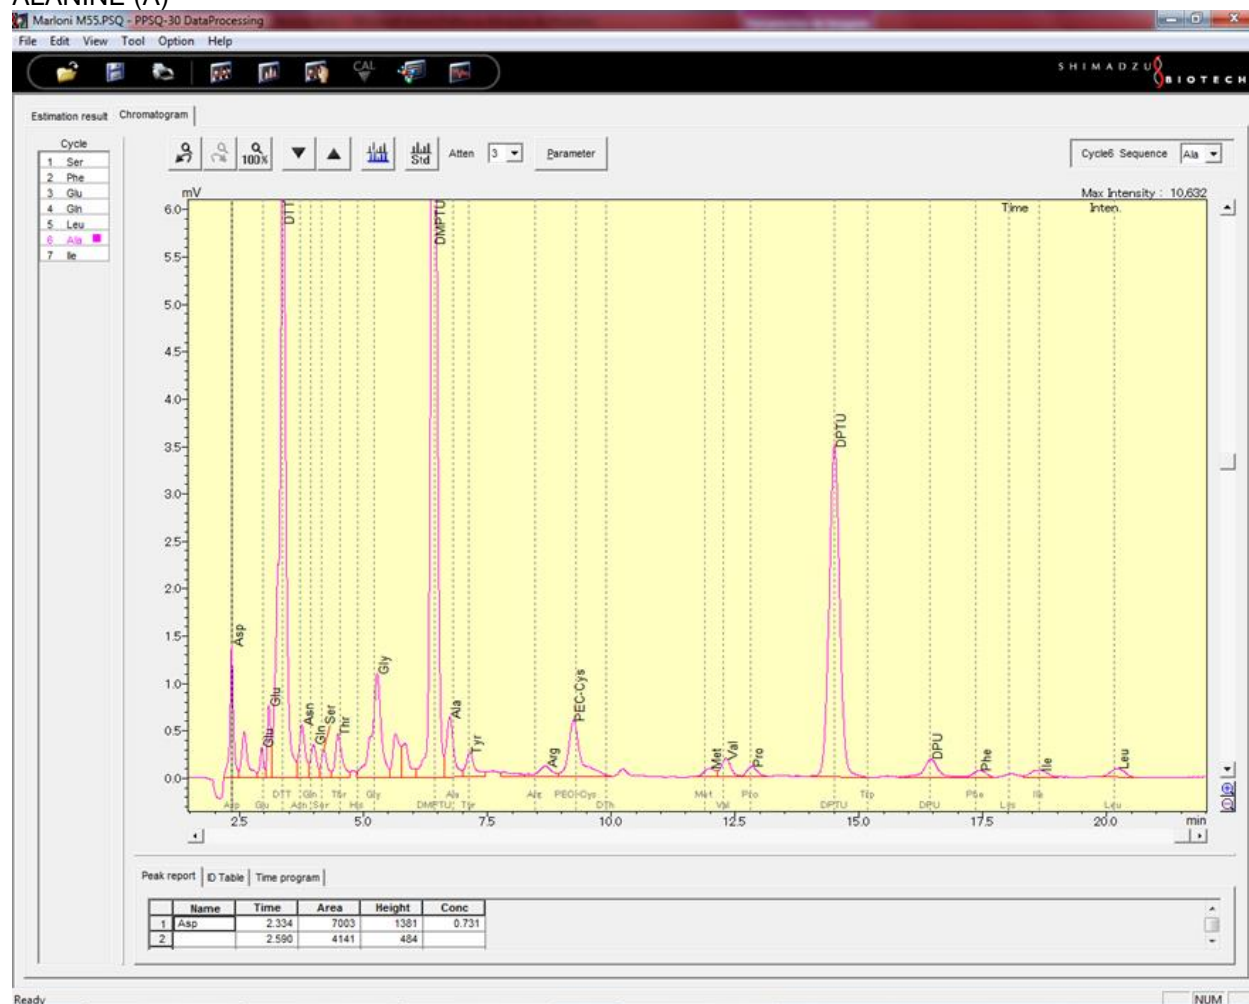



## ISOLEUCINE I

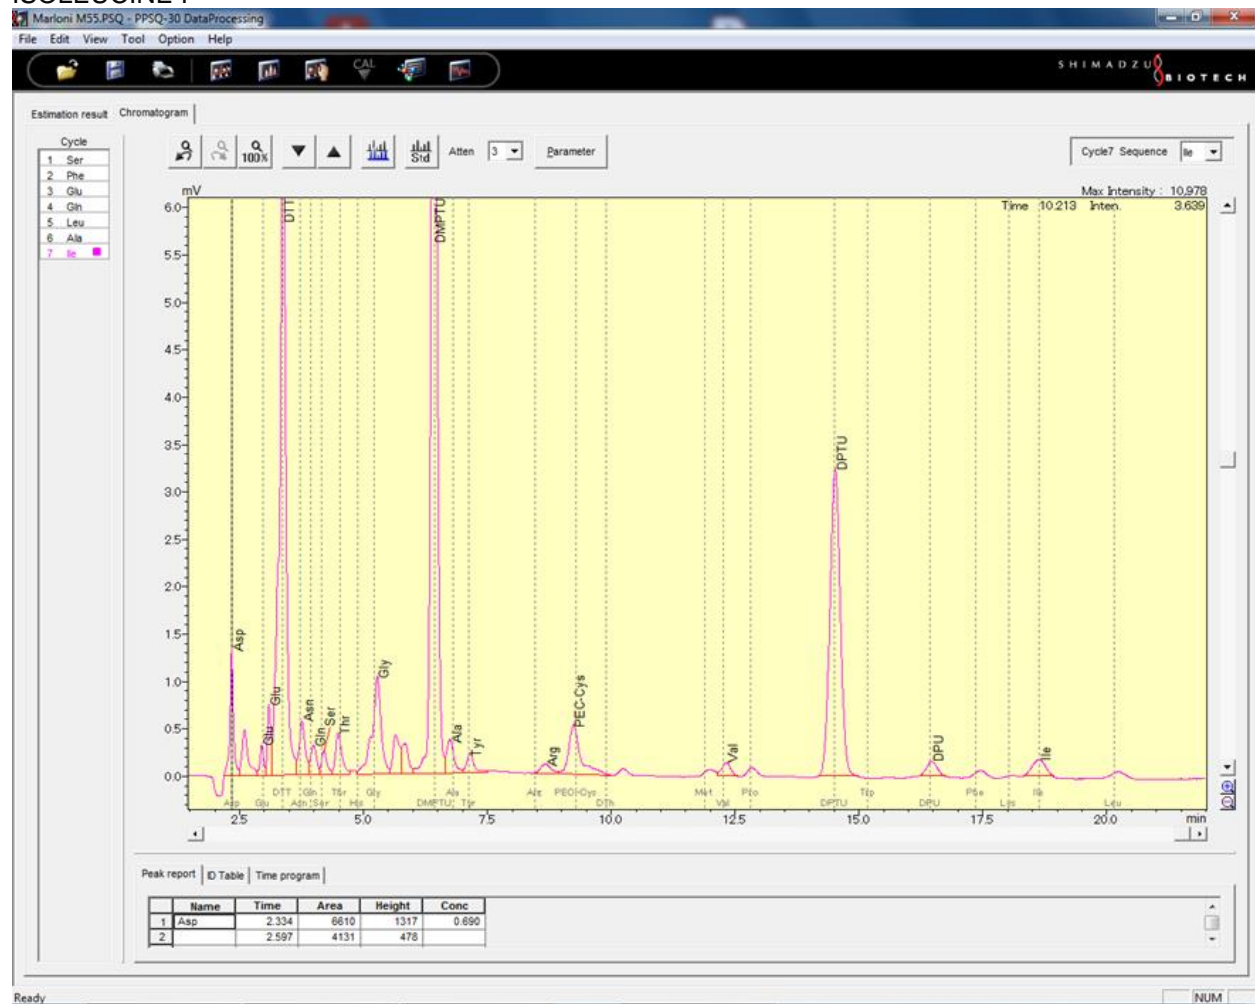

Supplementary Figure S1. N-terminal sequencing of 55kDa band. Each figure displays the chromatographic traces for each cycle ordered from N- to C- terminal.

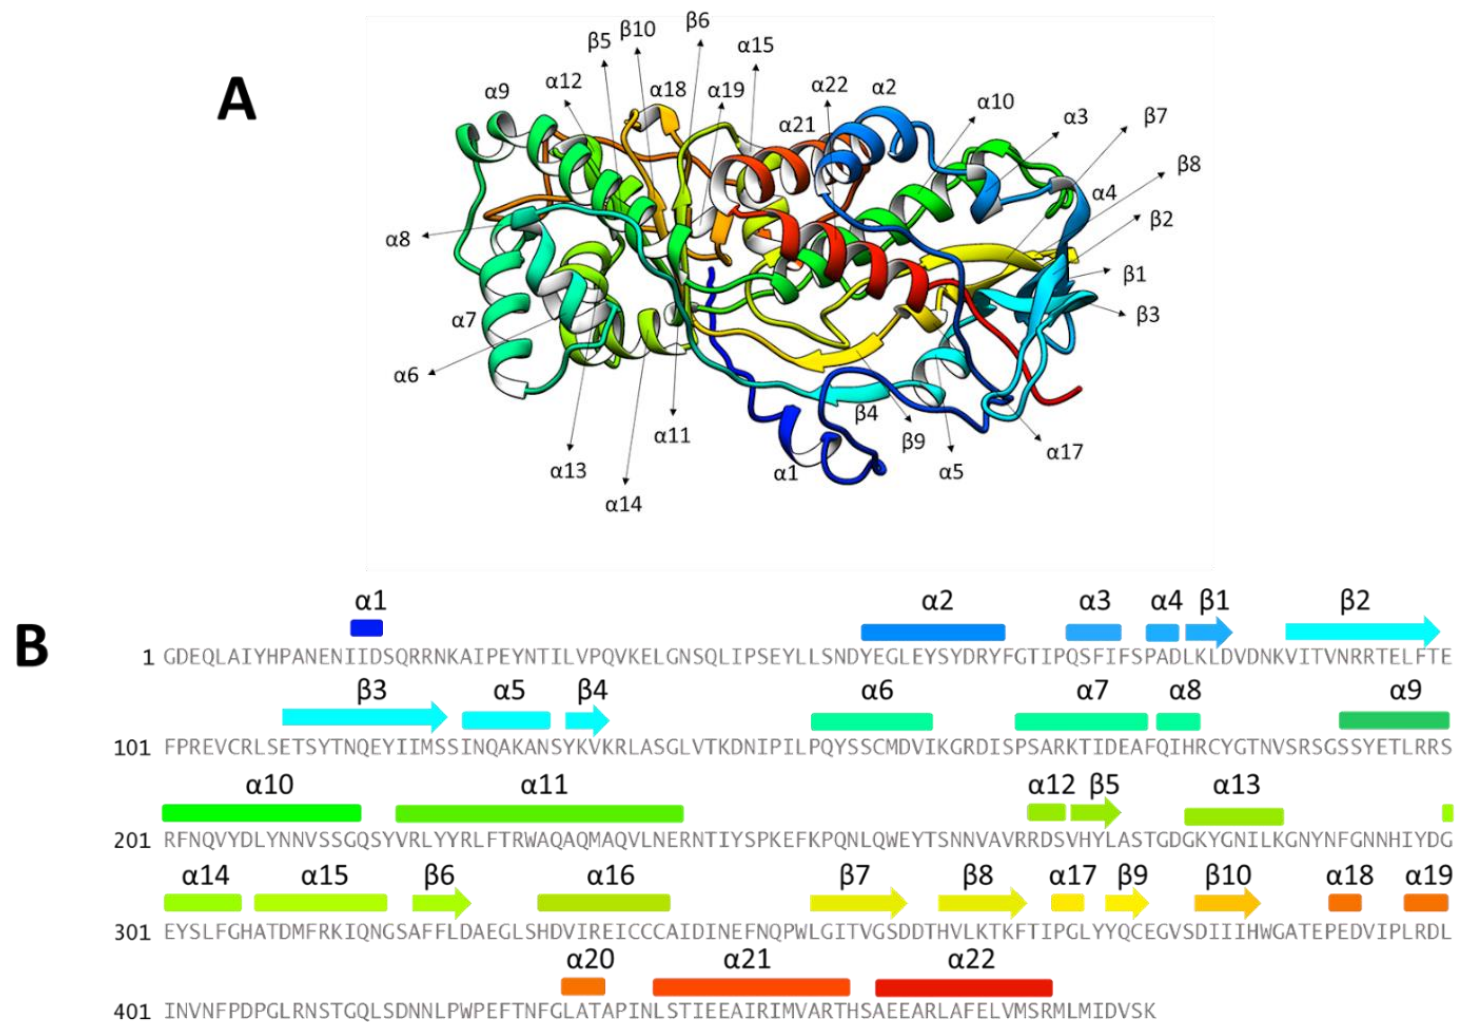

Supplementary Figure S2. Three-dimensional structure of PMeV p55 using AlphaFold. **A.** Ribbon diagram of p55 (diagram was positioned for easy visualization of secondary structures) rainbow-colored from blue (N-terminus) to red (C-terminus). **B.** Sequence of p55 and its respective secondary structures. The  $\alpha$ -helices (rectangles) and  $\beta$ -strands (arrows) are rainbow-colored from blue (N-terminus) to red (C-terminus).

# A

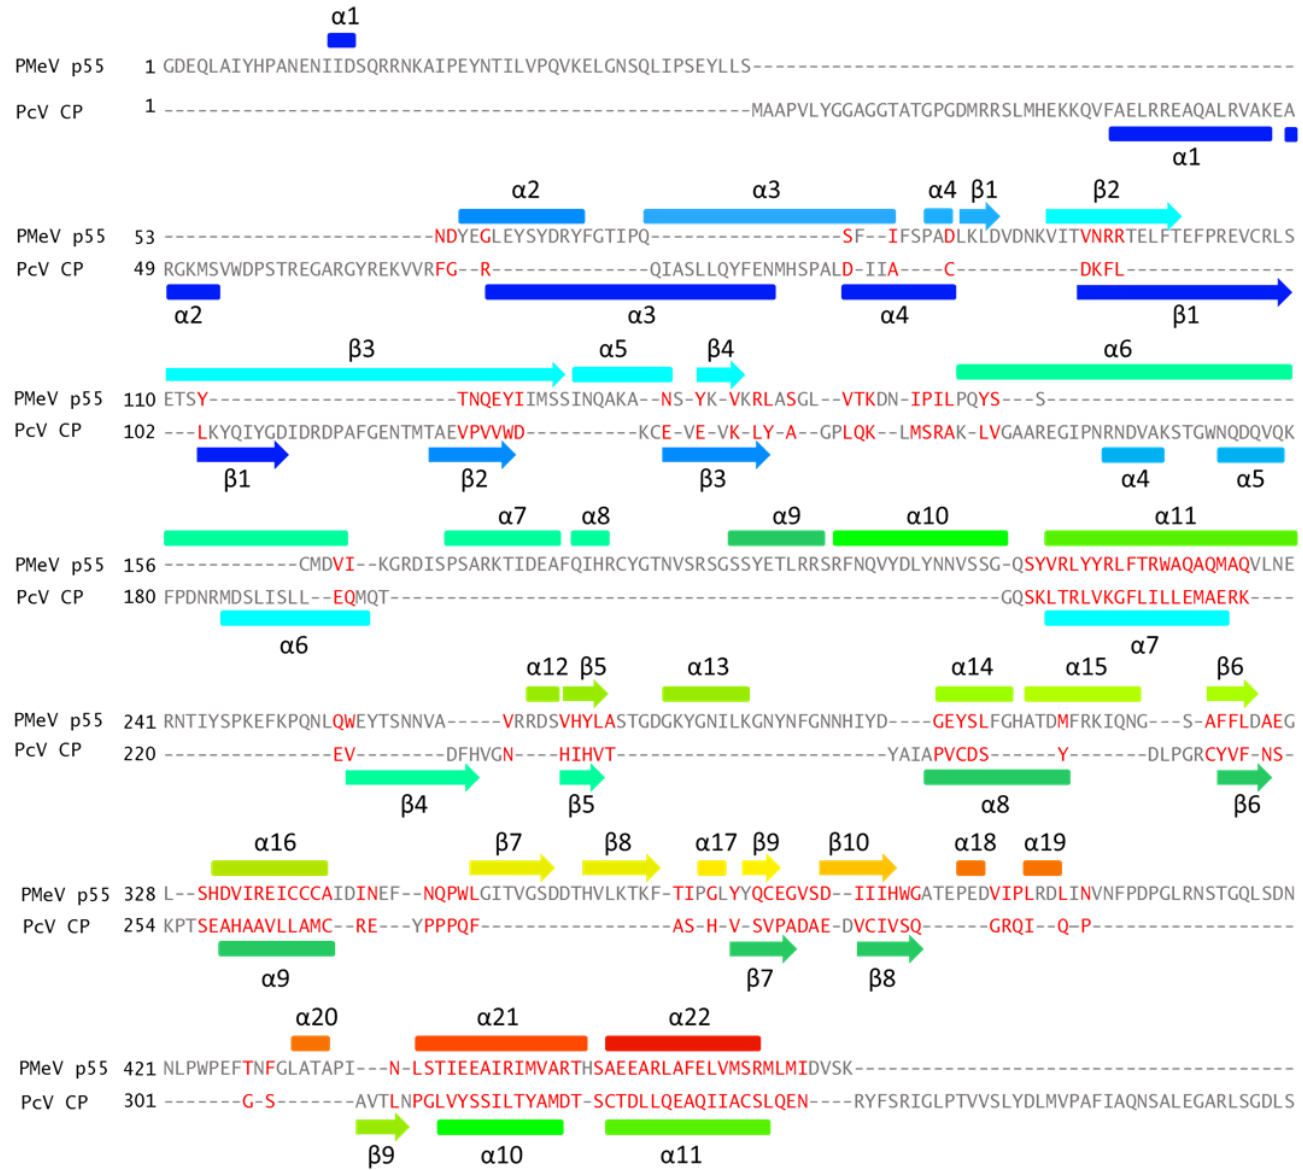

**B**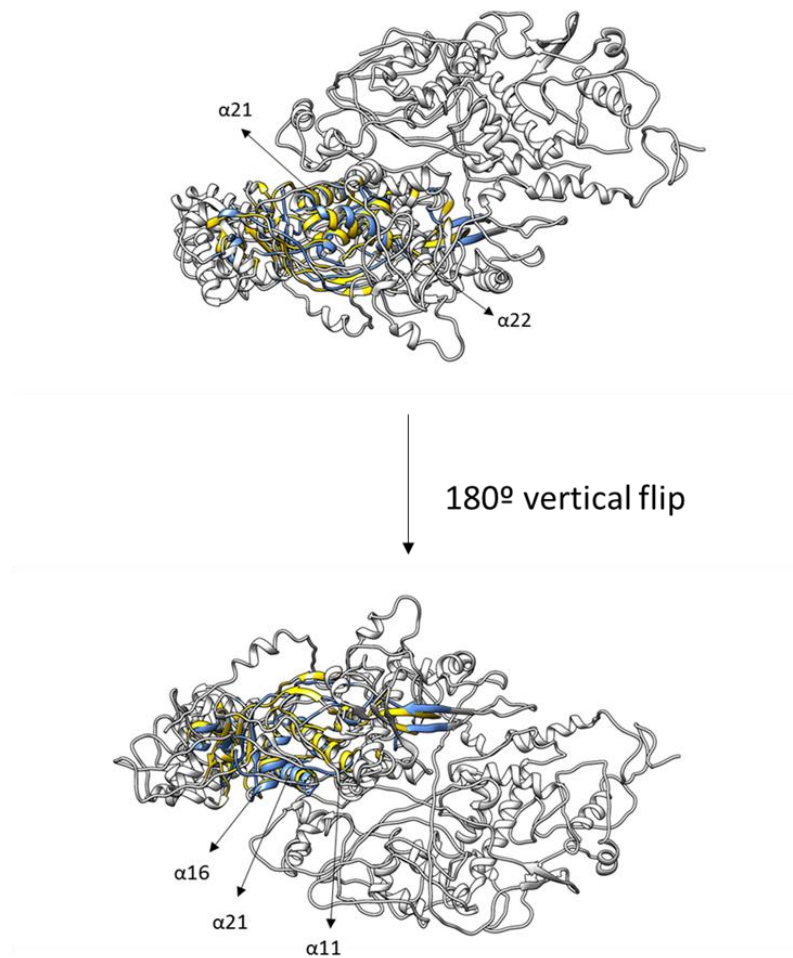

Supplementary Figure S3. Structural alignment of p55 and PcV capsid protein (CP) domain A. **A.** Sequence alignment of p55 and PcV CP domain A resulting from the Dali structural alignment. The  $\alpha$ -helices (rectangles) and  $\beta$ -strands (arrows) are rainbow-colored from blue (N-terminus) to red (C-terminus) for each protein. Conserved residues are represented in red. **B.** Superimposed structures of p55 (yellow) and PcV CP domain A (blue). White regions indicate non superimposed regions for both domains.

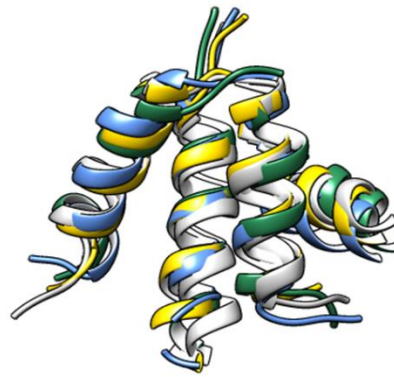

— 10 Å

Supplementary Figure S4. Superimposed structures of p53 (yellow), *Penicillium chrysogenum* virus (blue), *Saccharomyces cerevisiae* virus L-A (white), Omono river virus (green) capsid proteins.

| p-AD                                                                                          | p-BD          | Yeast Growth |     |              |      |        |      |
|-----------------------------------------------------------------------------------------------|---------------|--------------|-----|--------------|------|--------|------|
|                                                                                               |               | DDO          | QDO | QDOXA + 3-AT |      |        |      |
|                                                                                               |               |              |     | 0 mM         | 1 mM | 2.5 mM | 5 mM |
| T                                                                                             | 53            |              |     |              |      |        |      |
| T                                                                                             | Lam           |              |     |              |      |        |      |
|                                                                                               | Empty         |              |     |              |      |        |      |
| DNAJ heat shock family protein (AT2G22360)                                                    | ORF1 961-1200 |              |     |              |      |        |      |
|                                                                                               | ORF1 320-670  |              |     |              |      |        |      |
|                                                                                               | Empty         |              |     |              |      |        |      |
| Ribosomal protein L17 family protein (AT3G54210)                                              | ORF1 961-1200 |              |     |              |      |        |      |
|                                                                                               | ORF1 320-670  |              |     |              |      |        |      |
|                                                                                               | Empty         |              |     |              |      |        |      |
| Sec14p-like phosphatidylinositol transfer family protein (AT1G72160)                          | ORF1 961-1200 |              |     |              |      |        |      |
|                                                                                               | ORF1 320-670  |              |     |              |      |        |      |
|                                                                                               | Empty         |              |     |              |      |        |      |
| GDSL-like Lipase/Acylhydrolase superfamily protein (AT5G45670)                                | ORF1 961-1200 |              |     |              |      |        |      |
|                                                                                               | ORF1 320-670  |              |     |              |      |        |      |
|                                                                                               | Empty         |              |     |              |      |        |      |
| Chloroplast GRX 12, GRXS12 (AT2G20270)                                                        | ORF1 961-1200 |              |     |              |      |        |      |
|                                                                                               | ORF1 320-670  |              |     |              |      |        |      |
|                                                                                               | Empty         |              |     |              |      |        |      |
| Chaperone protein dnaJ-like protein (AT5G06130)                                               | ORF1 961-1200 |              |     |              |      |        |      |
|                                                                                               | ORF1 320-670  |              |     |              |      |        |      |
|                                                                                               | Empty         |              |     |              |      |        |      |
| GPI-anchored protein (AT3G18050)                                                              | ORF1 961-1200 |              |     |              |      |        |      |
|                                                                                               | ORF1 320-670  |              |     |              |      |        |      |
|                                                                                               | Empty         |              |     |              |      |        |      |
| Pyrimidin 4 (PYR4) (AT4G22930)                                                                | ORF1 961-1200 |              |     |              |      |        |      |
|                                                                                               | ORF1 320-670  |              |     |              |      |        |      |
|                                                                                               | Empty         |              |     |              |      |        |      |
| Pectinacetylsterase family protein (AT4G19420)                                                | ORF1 961-1200 |              |     |              |      |        |      |
|                                                                                               | ORF1 320-670  |              |     |              |      |        |      |
|                                                                                               | Empty         |              |     |              |      |        |      |
| Double Clp-N motif protein (AT4G12060)                                                        | ORF1 961-1200 |              |     |              |      |        |      |
|                                                                                               | ORF1 320-670  |              |     |              |      |        |      |
|                                                                                               | Empty         |              |     |              |      |        |      |
| PEBP (phosphatidylethanolamine-binding protein) family protein (FT) (AT1G6548)                | ORF1 961-1200 |              |     |              |      |        |      |
|                                                                                               | ORF1 320-670  |              |     |              |      |        |      |
|                                                                                               | Empty         |              |     |              |      |        |      |
| Clone RAFL09-89-G08 (R19778) putative cellulose synthase catalytic subunit (RSW1) (At4g32410) | ORF1 961-1200 |              |     |              |      |        |      |
|                                                                                               | ORF1 320-670  |              |     |              |      |        |      |
|                                                                                               | Empty         |              |     |              |      |        |      |
| mRNA for plastid protein, complete cds, clone: RAFL15-06-D14 (AT1G32580.1)                    | ORF1 961-1200 |              |     |              |      |        |      |
|                                                                                               | ORF1 320-670  |              |     |              |      |        |      |
|                                                                                               | Empty         |              |     |              |      |        |      |
| Papain family cysteine protease (AT4G16190)                                                   | ORF1 961-1200 |              |     |              |      |        |      |
|                                                                                               | ORF1 320-670  |              |     |              |      |        |      |



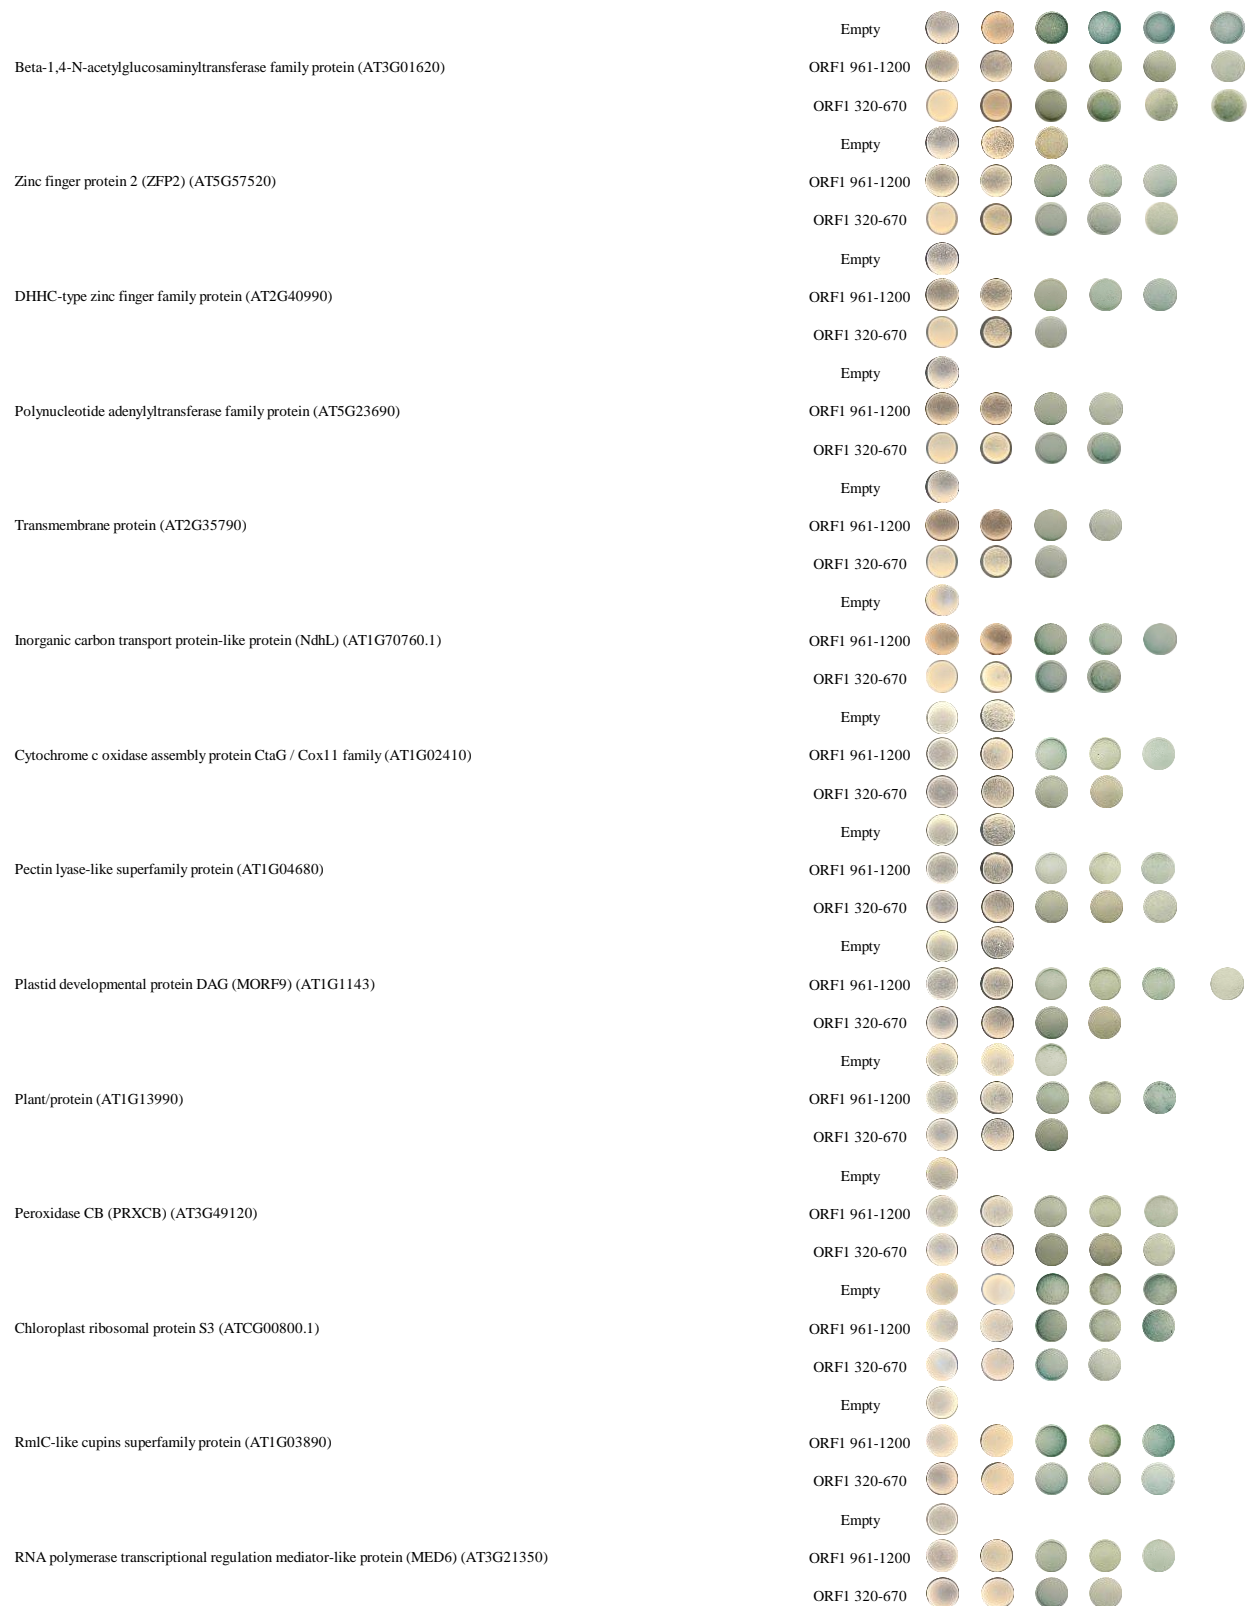

Supplementary Figure S5. Spot plating shows the validation of genuine positives interacting with CP2 and CP4.

[illegible]

Supplementary Figure S6. Protein-protein interaction network (PPI) of *Carica papaya* differentially accumulated proteins during papaya meleira virus (PMeV) complex infection and PMeV CP2 and CP4-interacting proteins;
